# Supplementary material for: The efficacy of exosomes from human chemically derived hepatic progenitors in liver damage alleviation: a preclinical experimental study
Source: PubMed Central journal article supplement — Ann Surg Treat Res. 2024 Oct 29;107(5):252–63. doi: 10.4174/astr.2024.107.5.252 (PMC11543897; doi:10.4174/astr.2024.107.5.252), 2024-10-29
Supplement: astr-107-252-s001.pdf [file astr-107-252-s001.pdf]

**Supplementary Table 1.** Clinical characteristics of liver donors

|                                      | Donor                            |                                                             |                                          |
|--------------------------------------|----------------------------------|-------------------------------------------------------------|------------------------------------------|
|                                      | 1                                | 2                                                           | 3                                        |
| Ethnicity                            | Asian                            | Asian                                                       | Asian                                    |
| Sex                                  | Female                           | Female                                                      | Male                                     |
| Age (yr)                             | 78                               | 54                                                          | 64                                       |
| Body mass index (kg/m <sup>2</sup> ) | 21.71                            | 24.29                                                       | 20.63                                    |
| Diagnosis                            | Cholangiocarcinoma, extrahepatic | Liver metastasis (D-colon cancer)                           | Liver metastasis (gastric cancer)        |
| Operation                            | Hepaticopancreaticoduodenectomy  | Left hemicolectomy, S5 wedge resection of liver, laparotomy | Laparoscopic S7 wedge resection of liver |
| Albumin (g/dL)                       | 2.9                              | 4.1                                                         | 4.1                                      |
| PT (INR)                             | 1.06                             | 0.96                                                        | 1                                        |
| Total bilirubin (mg/dL)              | 1.73                             | 0.57                                                        | 0.4                                      |
| ALP (U/L)                            | 359                              | 55                                                          | 84                                       |
| AST (U/L)                            | 45                               | 13                                                          | 27                                       |
| ALT (U/L)                            | 26                               | 6                                                           | 17                                       |
| Hepatitis                            | None                             | None                                                        | HBV+                                     |
| Alcohol use                          | No                               | No                                                          | No                                       |
| Smoking                              | No                               | No                                                          | No                                       |
| Creatinine                           | 0.47                             | 0.58                                                        | 1.05                                     |
| Specimen weight (g)                  | NA                               | NA                                                          | NA                                       |
| WBC (×10 <sup>3</sup> /μL)           | 5.0                              | 7.7                                                         | 4.87                                     |
| Hemoglobin (×10 <sup>3</sup> /μL)    | 10.5                             | 13.4                                                        | 10.7                                     |
| Platelet (×10 <sup>3</sup> /μL)      | 231                              | 317                                                         | 185                                      |

INR, international normalized ratio; NA, not available.
