# Supplementary material for: The efficacy of exosomes from human chemically derived hepatic progenitors in liver damage alleviation: a preclinical experimental study
Source: PubMed Central journal article supplement — Ann Surg Treat Res. 2024 Oct 29;107(5):252–63. doi: 10.4174/astr.2024.107.5.252 (PMC11543897; doi:10.4174/astr.2024.107.5.252), 2024-10-29
Supplement: astr-107-252-s002.pdf [file astr-107-252-s002.pdf]

**Supplementary Table 2.** Primer list

| Name                           | Forward                 | Reverse                   |
|--------------------------------|-------------------------|---------------------------|
| Human:                         |                         |                           |
| <i>CK19</i>                    | TCCGAACCAAGTTTGAGACG    | CCCTCAGCGTACTGATTTCC      |
| <i>EpCAM</i>                   | GAACAATGATGGGCTTTATG    | TGAGAATTCAGGTGCTTTTT      |
| <i>SOX9</i>                    | AAAGGCAACTCGTACCCAAATTT | AGTGGGTAATGCGCTTGGAT      |
| <i>CD44</i>                    | CATCTACCCAGCAACCCTA     | CTGTCTGTGCTGTCCGGTGAT     |
| <i>CK18</i>                    | GCTGGAAGATGGCGAGGACTTT  | TGGTCTCAGACACCACTTTGCC    |
| <i>ALB</i>                     | CACAGAATCCTTGGRGAACAGG  | ATGGAAGGTGAATGTTTCAGCA    |
| <i>HNF4<math>\alpha</math></i> | CCAAAACCCTCGTCGACATG    | GCACATTCTCAAATTCAGG       |
| <i>CYP1A2</i>                  | CGGACAGCACTTCCCTGAGA    | AGGCAGGTAGCGAAGGATGG      |
| <i>ASGR1</i>                   | CAGCAACTTCACAGCCAGCA    | AGCTGGGACTCTAGCGACTT      |
| <i>MRP2</i>                    | AGCGTCCTCTGACACTCG      | GGCATCTTGGCTTTGACT        |
| <i><math>\alpha</math>SMA</i>  | CTGTGCTTCGTCACCCACGTA   | GACAATGGCTCTGGGCTCTGTAA   |
| <i>COL1A1</i>                  | GAGGGCCAAGACGAAGACATC   | CAGATCACGTCATCGCACAAAC    |
| <i>TGF-<math>\beta</math>1</i> | CTCGCCAGAGTGGTTATCTT    | AGTGTGTATCCCTGCTGTCA      |
| <i>TIMP1</i>                   | GGATACTTCCACAGGTCCACAAA | CTGCAGGTAGTGATGTGCAAGAGTC |
| <i>GAPDH</i>                   | TGCACCACCAACTGCTTAGC    | GGCATGGACTGTGGTCATGAG     |
